# Supplementary material for: High-Throughput Crystallography Reveals Boron-Containing Inhibitors of a Penicillin-Binding Protein with Di- and Tricovalent Binding Modes
Source: J Med Chem. 2021 Jul 31;64(15):11379–94. doi: 10.1021/acs.jmedchem.1c00717 (PMC9282634; doi:10.1021/acs.jmedchem.1c00717)
Supplement: Supplementary file 3 — jm1c00717_si_003.csv [file jm1c00717_si_003.csv]

Compound	SMILES	Residual Activity by BOCILLIN FL FA (%)	Residual Activity by S2d Turnover (%)	Ki (μM)	Crystal Structure Reacted with PaPBP3
1	OB(O)C1=CC=CC(C2=NN=NN2)=C1	82 ± 4	ND	ND	7ATM
2	CC1=C(B(O)O)C=C2NN=CC2=C1	ND	ND	ND	7ATO
3	OC(C1=CC=C2C(B(OC2)O)=C1)=O	75 ± 1	57.8 ± 0.6	ND	7ATW
4	O=C(N1C(C)(C)C(N(C)CC1)=O)C2=CC=C3C(B(OC3)O)=C2	ND	ND	ND	7ATX
5	O=C(NC)CNC(C1=CC=C2C(B(OC2)O)=C1)=O	>90	>90	ND
6	O=C(C1=CC=C2C(B(O)OC2)=C1)N[C@@H](C(N)=O)CC3=CC=CC=C3	>90	>90	ND
7	O=C(OC)[C@@H](C1=CC=CC=C1)NC(C2=CC=C3C(B(OC3)O)=C2)=O	>90	>90	ND	7AU0
8	O=C(C1=CC=C2C(B(OC2)O)=C1)NCC(N3CCNC(C3)=O)=O	>90	ND	ND
9	O=C(N[C@@H](C(N1CC(N(CC1)C)=O)=O)CC2=CC=CC=C2)C3=CC=C4C(B(O)OC4)=C3	>90	ND	ND
10	O=C(NCC(N1CCN(C(C1)=O)C)=O)C2=CC=C3C(B(O)OC3)=C2	>90	ND	ND
11	O=C1CN(C([C@@H](CC2=CC=CC=C2)NC(C3=CC=C4C(B(OC4)O)=C3)=O)=O)CCN1	84 ± 1	80.9 ± 1.3	ND
12	NC([C@@H](C1=CC=CC=C1)NC(C2=CC=C3C(B(OC3CC(O)=O)O)=C2)=O)=O	16 ± 6	19.6 ± 0.4	73.9 ± 0.8	7AU1
13	O=C(NCC(N(CC1=O)CCN1C)=O)C2=CC=C3C(B(OC3CC(O)=O)O)=C2	42 ± 6	47.5 ± 0.6	172.0 ± 3.0	7AU8
14	O=C(N(CC1=CC=CC=C1)CC2=CC=CC=C2)C3=CC=C4C(B(OC4)O)=C3	87 ± 3	ND	ND	7AU9
15	OB1C2=CC=C(OCC3=CC=CC=C3)C=C2C(CC(O)=O)O1	20 ± 5	ND	78.1 ± 0.9	7AUB
Vaborbactam	O=C(O)C[C@@H]1CC[C@H](NC(CC2=CC=CS2)=O)B(O)O1	54 ± 5	75.8 ± 0.7	201.0 ± 2.3	7AUH
